# Supplementary material for: Neutrophils promote CXCR3-dependent itch in the development of atopic dermatitis
Source: eLife. 2019 Oct 21;8:e48448. doi: 10.7554/eLife.48448 (PMC6884397; doi:10.7554/eLife.48448)
Supplement: Figure 2—source data 1. [file elife-48448-fig2-data1.xlsx]

## Sheet: Figure 2A
MC903 - day 3	EtOH- day 3	GR1 MC903 Day 3		MC903 - day 5	EtOH- day 5	GR1 MC903 Day 5		MC903 - day 8	EtOH- day 8	GR1 MC903 Day 8
71	63	13		40	0	7		8	115	1
89	20	38		83	25	8		28	18	10
50	13	70		127	23	13		89	11	13
29	36	91		21	70	23		346	19	28
137	5	123		35	27	23		114	15	32
44	25	78		35	46	25		75	13	32
135	42	22		142	10	33		40	13	41
114	97	28		152	2	40		96	0	46
130	48	6		63	54	47		16	5	57
4	78	7		140	44	50		61	2	62
12	11	2		13	33	54		93	0	63
4	53	0		80	39	106		84	15	66
10	22	6		46	2	173		79	8	73
27	70	12		24	22	83		129	27	91
177	43	14		170	50	59		38	14	135
55	32	14		180	6	23		112	18	152
128	1	6		156	11	293		51	6	208
22	5			63	4			41	39
6	23			43	4			0	36
88	21			58	41			126	5
19	0			30	34			82	19
115	41			13	24			53	7
12	29			48	47			62	4
17	47			30	19			57	26
13	22			0	69			148	46
32	21			60	27			148	46
28	19			41	63			212	5
36	53			20	6			54	104
31	51			38	42			147	0
61	13			17	112			26	0
29	0			38	2			143	26
88	2			67	27			33	18
18	28			58	22			20	58
62	36			30	80			96	86
62	39			29	2			85	28
10	104			17	57			115	23
46	0			95	0			116	14
49	96			8	5			224	55
61	0			104	6			282	8
49	17			30	6			193	8
12	16			67	9			17	18
53	3			181	11			113	28
42	35			58	12			213	108
60	0			88	15			160	71
81	20			58	17			255	14
160	13			13	26			150	88
63	83			67	74			112	126
13	13			70	101			212	70
10	2			118	145			57	4
23	89			16	42			78	43
57	23			24	91			74	43
23				24	228			155	58
0				29	17			154	0
44				30	0			90	1
63				42	42			64	4
11				48	22			153	5
17				53				4	9
240				98				91	10
2				102				167	15
41				105				60	20
93				212				34	20
56				92				38	32
				71				53	32
				150				75	32
				117				79	45
				0				104	95
				27				108	8
				33				119	115
				42				143	218
								166	150
								196	190
								260	152
								282	16
								285	34
								318	5
								500	10
								33	115
								117	3
								156	0
								93	16
								52	80
								124	42
								146	1
								134	0
								213	28
								319
								17
								49
								70
								76
								132
								396

## Sheet: Figure 2B
aGR1 MC903	EtOH	MC903
Neutrophils	Neutrophils	Neutrophils
565.742	36.2327	266.644
79.9703	19.0513	2706.12
1986.49	30.4768	404.335
1505.63	7.47094	151.519
330.809	12.8176	57.3459
276.282	3.30467	5.78626
86.3538	6.73771	96.9773
509.688	109.054	1600.18
39.4737	24.3874	3195.35
1.79124	16.6966	2163.66
3.78007	27.9146	5399.16
31.1511	11.9048	894.543
1060.56	17.7186	1078.19
592.934	17.1001	1567.37
368.926	13.7694	545.752
197.361	15.5675	583.974
415.528	30.6542	3471.31
	66.7061	94.3838
	85.9846	331.215
	212.275	1520.33
	79.8043	2989.99
	123.88	2770.34
	29.5898	764.099
	23.367	939.002
	106.315	182.639
	9268.41	2732.23
	79.2093	364.658
	28.6131	2425.54
	117.836	417.091
	50.3209	2471.2
	30.7778	4181.84
	1.69465	4113.29
	22.924	1132.67
	13.0222	943.607
	40.5793	2438.9
	36.2412	2064.12
	35.9645	555.646
	42.4186	1414.94
		5412.83
		1292.74

## Sheet: Figure 2C
MC903	aGr1 + MC903	EtOH
Basophils	Basophils	Basophils
377.127	435.473	6.35744
1734.59	207.196	3.08856
728.295	1035.01	9.38248
167.194	919.049	13.0741
114.692	519.843	3.66218
7.71502	475.919	1.65234
88.1612	1234.68	3.36886
844.201	737.658	13.2187
1220.62	562.03	15.0077
792.019	256.147	7.15328
1226.46	425.258	9.81964
805.088	205.231	16.1746
494.631	161.265	14.4837
334.289	159.531	1.51787
125.249	99.4124	1.64204
534.765	201.157	3.40136
63.4945	149.204	0
114.843		1.55455
183.007		0
1291.59		15.2519
1531.99		22.924
1094.82		7.44123
484.182		10.5595
733.933		4.67025
340.496		21.1507
658.362		6.45351
81.707		15.7241
218.795		11.9706
294.143		4.12933
891.571		0
2023.97		2.92222
3161.95		1.58804
73.5785		0
144.562		161.265
342.103		0
183		2.70844
31.6856		1971.96
566.353		5.40064
1346.1
1163.72

## Sheet: Figure 2D
CD4 T cells - PBS	CD4 T cells - aGR1	CD4 T cells - PBS	CD4 T cells - aGr1
Day 8 MC903	Day 8 MC903	Day 8 EtOH	Day 8 EtOH
61.1592	34.2404	4.23308	15.4527
50.3319	41.6335	6.77966	296.095
99.9229	102.37	33.9708	12.1212
35.2214	50.0185	46.2877	22.0633
689.965	172.829	23.9236	32.9185
332.15	186.993	20.2802	314.121
306.023	269.617	6.91776	29.1537
240.076	423.562	40.283	381.818
401.735	760.139	29.7404
961.241	822.731
474.725	323.077
