# Supplementary material for: Neutrophils promote CXCR3-dependent itch in the development of atopic dermatitis
Source: eLife. 2019 Oct 21;8:e48448. doi: 10.7554/eLife.48448 (PMC6884397; doi:10.7554/eLife.48448)
Supplement: Figure 2—source data 2. — Figure 2—figure supplements 2–3. [file elife-48448-fig2-data2.xlsx]

## Sheet: Figure 2E, Supp 4A
Scratching behavior
PBS	Chloroquine-GR1	PBS-GR1	CXCL1-GR1	CXCL1
24	171	107	38	30
9	287	28	22	63
35	351	6	35	30
19	356	15	7	57
15	364	5	4	31
12	398	16	15	18
28		9	6	38
12		11	49	82
19		4	19	49
40		6	8	147
17				124
33				64
22				0
0				11
25				27
29				169
81				44
9				83
21				4
38				55
7				18
45				13
27				194
10				33
14				6
39				105
55				99
19				146
12				23
5				8
36				106
				76
				4
				21
				7
				61

## Sheet: Supp 2A
Neutrophil counts
5 min pbs neu	5 min cxcl1 neu	15 min pbs neu	15 min cxcl1 neu	30 min pbs neu	30 min cxcl1 neu
107.59	193.95	409.058	4517.96	80.93	3666.67
151.883	63.27	676.329	4886.08	165.22	3746.57
250	78.27	1104.48	7491.88	2737.14	4522.73
700.62	624.5	4008.15	11777.1		7494.17
	114.19				9696.02
					11085.6
					13038.4

## Sheet: Supp 3A
aGR1, neutrophils as % of Cd11b+
0
0
0.188
0
1.18
0
0.205
0
0
0.139
49
0.157
1.03
1.67
0.469
