# Supplementary material for: Neutrophils promote CXCR3-dependent itch in the development of atopic dermatitis
Source: eLife. 2019 Oct 21;8:e48448. doi: 10.7554/eLife.48448 (PMC6884397; doi:10.7554/eLife.48448)
Supplement: Figure 2—source data 3. [file elife-48448-fig2-data3.xlsx]

## Sheet: Figure 2F
Day 3 WT MC903	Day 3 WT EtOH	Day 3 TSLPR KO MC903	Day 3 TSLPR KO EtOH		Day 5 WT MC903	Day 5 WT EtOH	Day 5 TSLPR KO MC903	Day 5 TSLPR KO EtOH		Day 8 WT MC903	Day 8 WT EtOH	Day 8 TSLPR KO MC903	Day 8 TSLPR KO EtOH			Day 12 WT MC903	Day 12 WT EtOH	Day 12 TSLPR KO MC903	Day 12 TSLPR KO EtOH
71	63	80	0		40	0	68	15		8	115	52	15			165	34	20	25
89	20	63	12		83	25	31	30		28	18	120	8			55	86	50	41
50	13	13	24		127	23	61	22		89	11	12	25			262	27	64	24
29	36	37	0		21	70	41	0		346	19	138	21			76	21	82	76
137	5	31	13		35	27	83	44		114	15	48	80			82	71	17	30
44	25	0	13		35	46	0	37		75	13	44	60			139	81	5	28
135	42	111	90		142	10	87	4		40	13	48	0			129	10	54	104
114	97	108	159		152	2	8	0		96	0	30	16			22	135	69	33
130	48	43	164		63	54	17	79		16	5	180	51			127	12	24	50
4	78	69	8		140	44	48	2		61	2	254	35			36	11	60	69
12	11	45	14		13	33	23	104		93	0	127	117			34	0	150	17
4	53	127	0		80	39	48	24		84	15	18	113			289	33	237	132
10	22	48	19		46	2	30	80		79	8	18	27			30	42	127	8
27	70	70			24	22	67	44		129	27	16	19			160	58	57	42
177	43	78			170	50	11	23		38	14	46	11			256	44	58	20
55	32	36			180	6	50	21		112	18	32	71			112	33	35	11
128	1	49			156	11	45	87		51	6	128	23			260	68	9	0
22	5	16			63	4	191	64		41	39	187	19			186	112	66	85
6	23	100			43	4	36	100		0	36	111	28			67	84	69	10
88	21				58	41	60	112		126	5	251	38			250	30	177	113
19	0				30	34	73	55		82	19	199	4			139	0	56	142
115	41				13	24	68	61		53	7	143	6			38	71	98	82
12	29				48	47	84	222		62	4	104	91			4	21	10	75
17	47				30	19	52	49		57	26	111	88			91	43	56
13	22				0	69	108	114		148	46	28	33			167	43	39
32	21				60	27	93	156		148	46	202	35			60	58	195
28	19				41	63	39			212	5	151						9
36	53				20	6	24			54	104	42
31	51				38	42	71			147	0	21
61	13				17	112	75			26	0	36
29	0				38	2	68			143	26	85
88	2				67	27	16			33	18	30
18	28				58	22	22			20	58	4
62	36				30	80	49			96	86	106
62	39				29	2	0			85	28	56
10	104				17	57	60			115	23	36
46	0				95	0				116	14
49	96				8	5				224	55
61	0				104	6				282	8
49	17				30	6				193	8
12	16				67	9				17	18
53	3				181	11				113	28
42	35				58	12				213	108
60	0				88	15				160	71
81	20				58	17				255	14
160	13				13	26				150	88
63	83				67	74				112	126
13	13				70	101				212	70
10	2				118	145				57	4
23	89				16	42				78	43
57	23				24	91				74	43
23					24	228				155	58
0					29	17				154	0
44					30	0				90	1
63					42	42				64	4
11					48	22				153	5
17					53					4	9
240					98					91	10
2					102					167	15
41					105					60	20
93					212					34	20
56					92					38	32
					71					53	32
					150					75	32
					117					79	45
					0					104	95
					27					108	8
					33					119	115
					42					143	218
										166	150
										196	190
										260	152
										282	16
										285	34
										318	5
										500	10
										33	115
										117	3
										156	0
										93	16
										52	80
										124	42
										146	1
										134	0
										213	28
										319
										17
										49
										70
										76
										132
										396

## Sheet: Figure 2G
Neutrophils-WT							Neutrophils - KO
Day 3-MC903	Day 3-EtOH	Day 5-Mc903	Day 5-EtOH	Day 8-MC903	Day 8-EtOH		Day 3-MC903	Day 5-Mc903	Day 8-MC903
241.915	123.459	1043.25	52.4757	266.644	36.2327		413.229	4131.25	140.548
750.909	72.0655	1933.86	88.6805	2706.12	19.0513		371.154	1030.79	108.594
1164.33	136.847	2253.71	38.381	404.335	30.4768		121.229	1205.71	195.324
228.386	22.6493	2358	152.163	151.519	7.47094			1771.67	136.277
228.76	145.648	4773.14	274.149	57.3459	12.8176			2208.96	660.452
		6514.33	45.0829	5.78626	3.30467			1258.73	100.117
			52.0408	96.9773	6.73771				354.522
			119.159	1600.18	109.054				1100.65
				3195.35	24.3874				192.613
				2163.66	16.6966				333.41
				5399.16	27.9146				220.458
				894.543	11.9048				170.594
				1078.19	17.7186				392.523
				1567.37	17.1001				382.875
				545.752	13.7694				234.245
				583.974	15.5675
				3471.31	30.6542
				94.3838	66.7061
				331.215	85.9846
				1520.33	212.275
				2989.99	79.8043
				2770.34	123.88
				764.099	29.5898
				939.002	23.367
				182.639	106.315
				2732.23	9268.41
				364.658	79.2093
				2425.54	28.6131
				417.091	117.836
				2471.2	50.3209
				4181.84	30.7778
				4113.29	1.69465
				1132.67	22.924
				943.607	13.0222
				2438.9	40.5793
				2064.12	36.2412
				555.646	35.9645
				1414.94	42.4186
				5412.83	40.5793
				1292.74	36.2412
					35.9645
					42.4186
					109.054
					24.3874
					17.1001
					13.7694

## Sheet: Figure 2H
Basophils -WT							Basophils-KO
Day 3 MC903	Day 3 EtOH	Day 5 mC903	Day 5 EtOH	Day 8 MC903	Day 8 EtOH		Day 3 MC903	Day 5 mC903	Day 8 MC903	Day 8 EtOH
40.912	1.73886			377.127	6.35744		12.9641	74.1728	13.5468	3.47771
603.636	6.00546	164.822	7.23803	1734.59	3.08856		21.8326	23.6755	8.1385	7.31189
410.477	14.405	311.793	10.8588	728.295	9.38248		29.8103	7.34067	12.23	0
80.292	1.88744	482.679	311.793	167.194	13.0741			122.613	3.47606	0
88.6668	3.5524	1151.12	8.84671	114.692	3.66218			448.195	0	12.8056
		1262.46	10.7509	7.71502	1.65234			195.224	1.78022	55.7243
		612.146	2.81768	88.1612	3.36886				12.5866	16.977
			3.7172	844.201	13.2187				164.341	10.5557
			16.4989	1220.62	15.0077				8.37448	21.4971
				792.019	7.15328				38.6268
				1226.46	9.81964				24.0499
				805.088	16.1746				25.2732
				494.631	14.4837				5.60748
				334.289	1.51787				19.4084
				125.249	1.64204				10.3343
				534.765	3.40136
				63.4945	0
				114.843	1.55455
				183.007	0
				1291.59	15.2519
				1531.99	22.924
				1094.82	7.44123
				484.182	10.5595
				733.933	4.67025
				340.496	21.1507
				658.362	6.45351
				81.707	15.7241
				218.795	11.9706
				294.143	4.12933
				891.571	0
				2023.97	2.92222
				3161.95	1.58804
				73.5785	0
				144.562	161.265
				342.103	0
				183	2.70844
				31.6856	1971.96
				566.353	5.40064
				1346.1
				1163.72

## Sheet: Figure 2I
CD4 T cells	WT		CD4 T cells	KO
Day 8 MC903	Day 8 EtOH		Day 8 MC903	Day 8 EtOH
3.70964	1.31483		1.41213	2.72246
4.19092	0		0	0
49.7041	5.55413		12.9842	10.8556
33.45	1.27223		6.37356	27.2793
145.768	15.2837		7.32783
48.2203	22.8511		13.3796
244.858	25.1903		24.4805
649.382	70.4225		9.83991
532.204
650.42
570.674

## Sheet: Figure 2-S5
Basophils-KO				Mast cells - KO
Day 3 MC903	Day 5 mC903			Day 3 MC903	Day 5 MC903	Day 8 MC903	Day 8 EtOH
12.9641	74.1728			77.7843	317.391	8.46675	6.95542
21.8326	23.6755			325.67	140.232	17.9047	77.506
29.8103	7.34067			69.5574	113.78	92.5985	0
	122.613				664.599	41.7128	7.57576
	448.195				586.922	20.9924	43.9049
	195.224				875.72	12.4616	231.153
						140.55	123.083
						784.945	50.6672
						56.5278	17.5885
						105.715
						92.1913
						82.1379
						194.393
						294.655
						34.4478
