# Supplementary material for: Neutrophils promote CXCR3-dependent itch in the development of atopic dermatitis
Source: eLife. 2019 Oct 21;8:e48448. doi: 10.7554/eLife.48448 (PMC6884397; doi:10.7554/eLife.48448)
Supplement: Figure 2—source data 5. [file elife-48448-fig2-data5.xlsx]

## Sheet: Figure2J
Live cells	CD45	Cd11b	IMs	Neutrophils	FcerI	Basophils	Ly6G-,CD11b+	injection	treatment
627942	10211.6	4068.58	510.078	616.512	148.605	74.3027	3080.55	PBS	MC903
1.19856e+06	15529.5	4559.34	201.61	1962.46	2552.49	342.182	2199.21	PBS	MC903
661310	7682.76	2212.81	167.488	287.685	29.5567	19.7044	1848.28	PBS	MC903
789291	19669.8	6544.86	109.407	2500.72	4913.53	955.355	3641.68	PBS	MC903
1.29241e+06	14376.6	4990.21	116.39	1823.44	150.337	82.4427	2900.04	PBS	MC903
955401	8947.74	2075.96	250.871	330.314	1124.74	296.864	1392.33	PBS	MC903
221031	2158.81	718.938	3.98304	5.97455	29.8728	1.99152	716.946	no injection	EtOH
664993	17755.9	2568.34	50.691	45.0587	1453.14	36.6102	2624.67	no injection	EtOH
300041	2982.28	569.62	2.53165	0	344.304	7.59494	556.962	no injection	EtOH
517333	7832.15	2196.26	13.9445	9.29632	713.493	37.1853	2198.58	no injection	EtOH
724951	11318.6	1569.69	30.8331	36.4391	156.969	8.40903	1558.47	no injection	EtOH
1.34207e+06	14945.8	3262.45	58.563	222.052	4514.23	856.484	2540.17	aGr1	MC903
1.01413e+06	14471.3	3559.4	19.8849	22.3705	3288.47	320.644	3668.77	aGr1	MC903
564976	7676.56	1845.36	18.3732	10.3349	1894.74	335.311	1864.88	aGr1	MC903
398604	12180.8	4635.78	64.0892	658.371	1538.14	524.366	2986.94	aGr1	MC903
716347	4316.45	1078.23	14.1872	31.9212	24.8276	7.0936	946.995	aGr1	MC903
10800	0.992043	0	0	0	0	0	0	unstained control

## Sheet: Figure 2K
MC903-PBS	EtOH	MC903-Gr1
79	15	14
52	0	28
121	1	18
93	0	10
81	5	25
118		24
75		19
41		11
106		13
95		5
68		40
62		0
