# Supplementary material for: Neutrophils promote CXCR3-dependent itch in the development of atopic dermatitis
Source: eLife. 2019 Oct 21;8:e48448. doi: 10.7554/eLife.48448 (PMC6884397; doi:10.7554/eLife.48448)
Supplement: Figure 2—source data 6. [file elife-48448-fig2-data6.xlsx]

## Sheet: Figure2-S5A
	CD45+	Cd11b+	IMs	Neutrophils	FceRI+	Basophils	Cd11b+/Ly6G-	Treatment
A	47473.5	23805.5	10410.4	6000.7	2875.77	72.6728	17010.6	DNFB
B	87638.9	55872.6	17411.5	25981.7	8457.61	255.738	27921.1	DNFB
C	41649.2	16700.5	5970.96	6578.39	7025.96	309.86	9320.41	DNFB
D	42666.4	22480.1	6557.4	9729.24	3880.69	175.626	11595.5	DNFB
E	26594.1	10859.6	3560.32	4314.94	3640.6	208.723	5916.48	DNFB
F	72507.7	40984.4	15695.6	11853.2	6144.43	185.514	28012.5	DNFB
G	48212.1	23827.4	8379.79	8556.85	2327.88	107.396	14411.4	DNFB
H	56516	29301.1	11717.3	9309.55	7077.99	292.989	19174.2	DNFB
I	41541.1	23325.1	8469.01	5630.29	1070.41	82.521	16935.7	DNFB
J	25890.3	11667.8	4073.51	2655.9	1563.16	73.8337	8571.03	DNFB
K	7860.87	888.116	129.855	125.217	1020.29	30.1449	688.696	Vehicle
L	6122.89	1458.02	195.824	193.885	513.796	23.2662	1180.76	Vehicle
M	14557.8	1492.76	143.448	286.897	3037.07	329.483	1087.07	Vehicle
N	8459.52	1044.87	85.2958	176.684	1300.76	39.6016	785.94	Vehicle
O	3722.06	941.619	177.664	115.482	219.859	6.6624	772.838	Vehicle
P	10734.9	1184.87	225.811	213.125	2083.04	65.9673	885.484	Vehicle
Q	8028.13	991.99	104.922	123.999	1697.83	41.3329	826.659	Vehicle
R	6718.24	1636.34	516.226	126.621	292.203	29.2203	1407.45	Vehicle
S	9695.64	1901.77	284.806	287.868	1240.28	21.437	1494.46	Vehicle
T	7744.95	1053.51	130.125	145.14	583.061	57.5553	848.316	Vehicle
