# Supplementary material for: Neutrophils promote CXCR3-dependent itch in the development of atopic dermatitis
Source: eLife. 2019 Oct 21;8:e48448. doi: 10.7554/eLife.48448 (PMC6884397; doi:10.7554/eLife.48448)
Supplement: Supplementary file 2. [file elife-48448-supp2.xlsx]

## Sheet: Sheet1
Comparison	Condition 1	Mean +/- SEM 1	Condition 2	Mean +/- SEM 2	test statistic	p	significance
Scratching behavior in mice treated with MC903 for 7 versus 8 days	7 days of treatment	98.08 ± 14.94, n=12	8 days of treatment	107.3 ± 9.342, n=58	t=0.4247 df=68	0.6724	ns
Scratching behavior in mice treated with MC903 for 11 versus 12 days	11 days of treatment	132.5 ± 18.52, n=22	12 days of treatment	91.25 ± 16.62, n=4	t=0.9232 df=24	0.3651	ns
Scratching behavior in mice treated with MC903 for 8 days, mice receiving PBS injection versus no injection	No injection	172.5 ± 31.87, n=16	PBS	107.3 ± 9.342, n=58	t=1.964 df=64	0.0655	ns
Scratching behavior in mice treated with EtOH for 8 days, mice receiving PBS injection versus no injection	No injection	43.75 ± 25.52, n=8	PBS	30.35 ± 4.749, n=49	t=0.8711 df=55	0.3875	ns
Scratching behavior in mice treated with EtOH for 8 days, mice receiving PBS injection versus aGR1 injection	PBS injection	34.56 ± 13.77, n=9	aGR1	43.75 ± 25.52, n=8	t=0.3273 df=15	0.7479	ns
Scratching behavior in mice treated with EtOH for 8 days, mice receiving PBS or aGR1 injection versus no injection	No injection	38.88 ± 13.62, n=17	PBS + aGR1	30.35 ± 4.749, n=49	t=0.5916 df=20.03	0.5607	ns
Scratching behavior in mice treated with EtOH for 8 days, mice receiving aGR1 injection versus no injection	No injection	34.56 ± 13.77, n=9	aGR1	30.35 ± 4.749, n=49	t=0.3363 df=56	0.7379	ns
Neutrophil counts in mice treated with MC903 for 8 days, mice receiving PBS injection versus no injection	No injection	1427 ± 354.2, n=5	PBS	1455 ± 311.7, n=25	t=0.03852 df=28	0.9695	ns
Neutrophil counts in mice treated with EtOH for 8 days, mice receiving PBS injection versus no injection	No injection	37.51 ± 7.526, n=17	PBS	388 ± 341.7, n=27	t=0.8103 df=42	0.4223	ns
Inflammatory monocyte counts in mice treated with MC903 for 8 days, mice receiving PBS injection versus no injection	No injection	1706 ± 930.9, n=5	PBS	707.3 ± 163.1, n=25	t=1.87 df=28	0.072	ns
Inflammatory monocyte counts in mice treated with EtOH for 8 days, mice receiving PBS injection versus no injection	No injection	280.5 ± 245.3, n=27	PBS	154.1 ± 73.91, n=12	t=0.3381 df=37	0.7372	ns
Neutrophil counts in TSLPR KO and WT mice treated with EtOH for 7 days	TSLPR KO	163.4 ± 112.3, n=9	WT	286.8 ± 242.8, n=38	t=0.2438 df=45	0.8085	ns
Basophil counts in TSLPR KO and WT mice treated with EtOH for 7 days	TSLPR KO	45.06 ± 18.25, n=9	WT	312 ± 165.8, n=38	t=0.7765 df=45	0.4415	ns
