# Supplementary material for: Neutrophils promote CXCR3-dependent itch in the development of atopic dermatitis
Source: eLife. 2019 Oct 21;8:e48448. doi: 10.7554/eLife.48448 (PMC6884397; doi:10.7554/eLife.48448)
Supplement: Supplementary file 3. [file elife-48448-supp3.xlsx]

## Sheet: Sheet1
WT control animals	Panel	CD45+ count, average	CD45+ count, SEM	N	Neutrophils, % of CD45	SEM	Basophils, % of CD45	SEM	Inflammatory Monocytes, % of CD45	SEM	Mast Cells, % of CD45	SEM	Eosinophils, % of CD45	SEM	T cells, % of CD45	SEM
Day 2 MC903	Myeloid cells	994.709	208.557	4	4.30458	0.316718	3.76995	1.29492	4.25544	0.39495	1.15431	0.384693	11.8111	2.22943
Day 2 EtOH	Myeloid cells	2155.09	521.61	4	4.15093	0.578976	0.0968683	0.0561872	6.46302	2.36209	1.3498	0.482286	8.10754	0.324305
Day 3 MC903	Myeloid cells	20510.5	3649.7	5	2.82645	0.253226	1.07256	0.218309	5.23202	0.332673	1.50283	0.219415	11.7007	1.87332
Day 3 EtOH	Myeloid cells	7835.67	1645.74	5	3.37541	1.01394	0.0613822	0.0149137	4.28902	1.00699	1.03363	0.195799	12.534	1.5636
Day 5 MC903	Myeloid cells	20617.3	2117.54	6	15.0713	0.164559	4.00207	0.889225	5.43932	0.276291	1.58155	0.383222	7.85679	0.820748
Day 5 EtOH	Myeloid cells	18926.3	2138.01	8	1.81657	0.47353	0.343297	0.247096	3.56707	0.806221	1.16445	0.404404	14.3774	4.11441
Day 8 MC903	Myeloid cells	16709.6	330.34	40	9.2632	0.141354	3.58682	0.246815	7.27591	0.121614	2.12604	0.202991	11.2704	0.803115
Day 8 EtOH	Myeloid cells	34234.7	4854.44	38	1.0208	0.0147938	0.286091	0.0800895	1.46468	0.0685024	1.89727	0.232158	12.6821	1.0103
Day 3 MC903	T cells	2186.72	105.859	8											0.639721	0.0689385
Day 3 EtOH	T cells	1688.18	272.458	6											1.35089	0.181709
Day 5 MC903	T cells	6123.03	267.835	9											2.02699	0.184342
Day 5 EtOH	T cells	1867.2	192.506	8											1.14903	0.0949265
Day 8 MC903	T cells	4288.2	442.872	11											4.94742	0.261612
Day 8 EtOH	T cells	657.031	72.5322	8											2.47572	0.327575
CXCL1 5 minutes	Neutrophils	6905.08	1387.94	5	5.07675	0.861727
CXCL1 15 minutes	Neutrophils	32807.7	5225.9	4	24.0372	1.67722
CXCL1 30 minutes	Neutrophils	13298	761.45	7	57.4769	2.16128
PBS 5 minutes	Neutrophils	10415.1	1140.2	4	2.90019	0.473191
PBS 15 minutes	Neutrophils	39658.5	3923.2	4	3.36407	0.608023
PBS 30 minutes	Neutrophils	7091.67	2854.38	3	9.20755	2.10627
EtOH Day 12	Neutrophils	8409.54	2869.47	5	0.23014	0.106603	0.218302	0.0909621	0.242542	0.108232
PBS Day 12	Neutrophils	12736.3	1869.32	6	9.84211	3.06575	2.31732	1.11773	1.77425	0.477475
aGR1-injected animals	Panel	CD45+ count, average	CD45+ count, SEM	N	Neutrophils, % of CD45	SEM	Basophils, % of CD45	SEM	Inflammatory Monocytes, % of CD45	SEM	T cells, % of CD45	SEM
Day 8 MC903	Myeloid cells	8947.4	273.507	17	4.99982	0.294698	5.30546	0.587014	8.34025	0.312375
Day 8 MC903	T cells	3710.33	296.022	11							7.81103	0.268432
Day 12 MC903	Neutrophils	10718.2	2053.42	5	1.76345	1.1536	3.8139	1.30004	0.32673	0.100908
TSLPR KO animals	Panel	CD45+ count, average	CD45+ count, SEM	N	Neutrophils, % of CD45	SEM	Basophils, % of CD45	SEM	Mast Cells, % of CD45	SEM	T cells, % of CD45	SEM
Day 3 MC903	Myeloid cells	20725.3	7582.02	3	2.54439	0.767733	0.207953	0.109086	0.877695	0.0922843
Day 5 MC903	Myeloid cells	16064.2	1279.56	6	13.5978	1.04423	0.761028	0.314614	2.5971	0.356992
Day 8 MC903	Myeloid cells	5103.38	389.604	15	6.90591	0.228456	0.36976	0.0656029	2.20747	0.405172
Day 8 MC903	T cells	978.801	100.081	8							1.87636	0.358731
Day 8 EtOH	T cells	1326.83	247.838	4							1.49873	0.629981
DNFB-treated animals	Panel	CD45+ count, average	CD45+ count, SEM	N	Neutrophils, % of CD45	SEM	Basophils, % of CD45	SEM	Inflammatory Monocytes, % of CD45	SEM	T cells, % of CD45	SEM
DNFB	Neutrophils	49068.9	6046.89	10	18.466	4.21898	0.359672	0.0583111	18.7992	2.99301
Vehicle	Neutrophils	8364.5	917.691	10	18.466	4.21898	0.770723	0.3581	2.38386	0.477493
